# Supplementary material
Source: PubMed Central journal article supplement (PMC1995710)

# Supplementary Figure 1. Oztan *et al.*

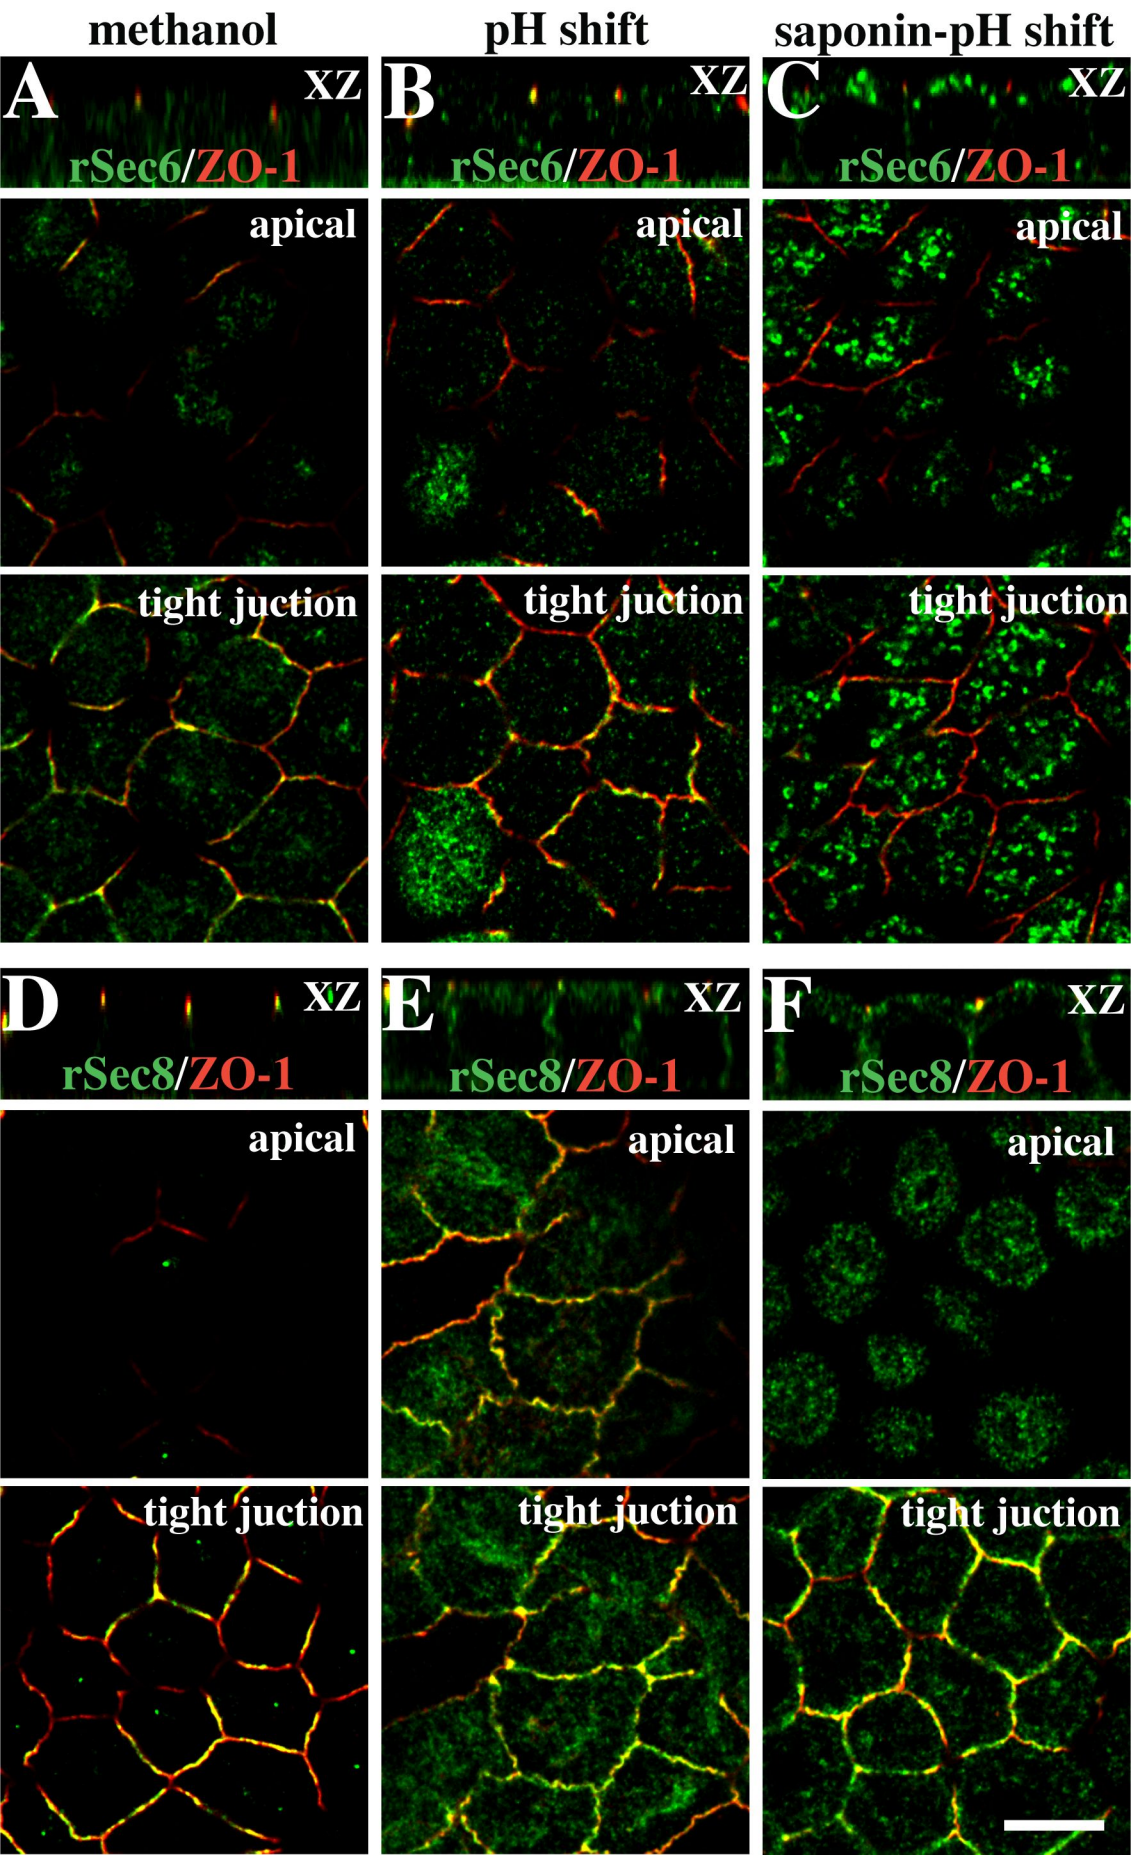

Supplement: E07-02-0097_1.pdf [file E07-02-0097_1.pdf]

Supplementary Figure 2. Oztan *et al.*

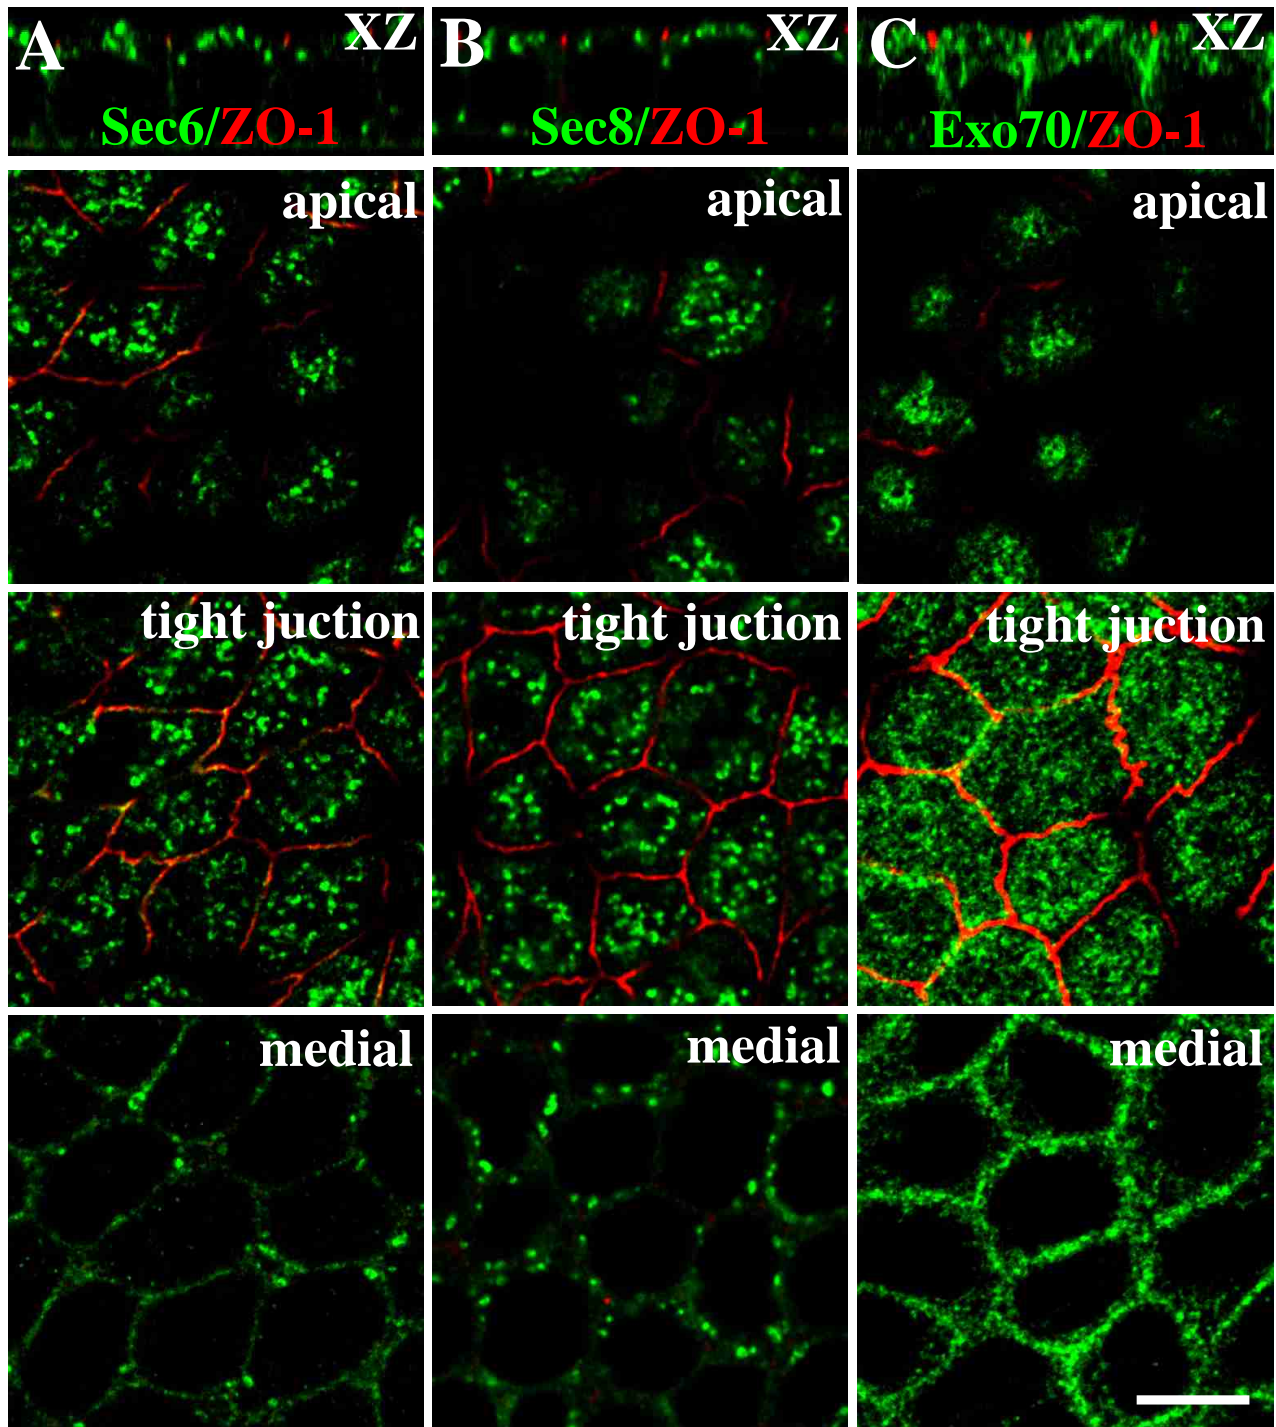

Supplement: E07-02-0097_2.pdf [file E07-02-0097_2.pdf]
